# Supplementary material for: Cyanocobalamin supplementation strategies in patients with Crohn's Disease and ileocolic resection in clinical practice
Source: Research Square preprint supplement (doi:10.21203/rs.3.rs-8704293/v1), 2026-02-04
Supplement: Supplementary file 1 [file a2a4d105bad287a33cef266a.docx]

**Table 2**. Univariate analysis of factors associated with the development of B12 deficiency during follow-up.

|  | **B12 deficiency** | **No B12 deficiency** | **p-value** |
| --- | --- | --- | --- |
| Female sex | 28 (29) | 69 (71) | 0.530 |
| Additional risk factors for B12 deficiency* | 4 (29) | 10 (71) | 0.552 |
| Omeprazole intake | 7 (20) | 28 (80) | 0.122 |
| Crohn’s disease location   - Ileal - Colonic - Ileocolonic | 27 (30)  3 (75)  31 (30) | 62 (70)  1 (25)  73 (70) | 0.863  0.089  0.710 |
| Crohn’s disease behaviour   - Inflammatory - Fibrostenosing - Penetrating | 5 (17)  27 (33)  29 (34) | 24 (83)  55 (67)  57 (66) | 0.126  0.615  0.461 |
| Post-surgical recurrence   - Clinical - Endoscopic - Surgical | 65 (68)  34 (83)  18 (41) | 30 (32)  7 (17)  26 (59) | 0.857  0.716  0.105 |
| B12 supplementation prior to surgery | 9 (69) | 4 (31) | 0.003 |
| Ileal resection ≥ 20 cm | 40 (37) | 68 (63) | 0.042 |

*Positive anti-intrinsic factor/anti-parietal cell antibodies, positive anti-intrinsic factor/anti-parietal cell antibodies, positive anti-tissue transglutaminase IgA antibodies, pancreatic disease, secondary amyloidosis, malnutrition, small bowel carcinoma, carcinoid tumour, hypothyroidism, treatment with metformin.
