# Supplementary material for: Cyanocobalamin supplementation strategies in patients with Crohn's Disease and ileocolic resection in clinical practice
Source: Research Square preprint supplement (doi:10.21203/rs.3.rs-8704293/v1), 2026-02-04
Supplement: Supplementary file 2 [file f6764cdbd1962efd8c060693.docx]

**Table 1**. Clinical and demographic characteristics of the study population (N=197).

| Female sex | 97 (49) |
| --- | --- |
| Age at Crohn’s disease diagnosis | 26 (20 – 36) |
| Crohn’s disease location  Ileal / Colonic / Ileocolonic | 89 (45) / 4 (2) / 104 (53) |
| Crohn’s Disease behaviour  Inflammatory / Fibrostenosing / Penetrating | 29 (14) / 82 (42) / 86 (44) |
| Additional risk factors for vitamin B12 deficiency  Positive anti-intrinsic factor/anti-parietal cell antibodies*  Positive anti-tissue transglutaminase IgA antibodies**  Pancreatic disease  Secondary amyloidosis  Malnutrition  Small bowel carcinoma  Carcinoid tumour  Hypothyroidism  Treatment with metformin  Omeprazole therapy | 91 (46)  24 (12)  15 (8)  6 (4)  2 (1)  1 (1)  1 (1)  1 (1)  1 (1)  1 (1)  35 (18) |
| Age at first surgery | 35 (27-46) |
| Type of ileal resection  Ileocecal / Ileal | 185 (94) / 12 (6) |
| Length of ileal resection | 20 (14-36) |
| Post-surgical recurrence  Clinical *** / Endoscopic / Surgical | 95 (48) / 41 (21) / 44 (22) |
| Follow-up, *months* | 114 (60-159) |

*available for 30 patients; **available for 24 patients, ***abdominal pain, increased frequency of bowel movements, and episodes of subacute bowel obstruction.
